# Supplementary material
Source: publisher figshare collection journal article supplement (https://tandf.figshare.com/ndownloader/files/14883392)
Supplement: Supplementary file 1 [file 14883392]

**Supplementary Materials**

**Improving dewaterability and other properties of citric acid wastewater treatment sludge by ozone and peroxone**

Ning Ding1,2*, Can Peng1, Hong Liu3, Yuxiao Ren1, Xiao Wang1, Ping Wang1, Liming Dong1, Xiuyu Hu4

1Key Laboratory of Cleaner Production and Comprehensive Utilization of Resources, China National Light Industry, Beijing Technology and Business University, Beijing, China

2School of Material Science and Engineering, University of Science & Technology Beijing, Beijing, China

3School of Environmental Science and Engineering, Suzhou University of Science and Technology, Jiangsu Province, China

4China Biotech Fermentation Industry Association, Beijing, China

*Corresponding author: Ning Ding

Assistant Professor

Department of Environmental Science and Engineering

School of Food and Chemical Engineering

Beijing Technology and Business University

Fucheng Road No.11, Haidian District,

Beijing, China 100048

Office phone: +8610-68984448

Mobile phone: +86-15611068901

E-mail: [dingning@btbu.edu.cn](mailto:dingning@btbu.edu.cn)

(a)

(b)

(c)

Fig. S1 Effect of ozonation, H2O2 and O3/H2O2 treatment on (a) N-NO2-, (b) N-NO3-, and (c) N-NH4+ in the supernatant

Fig. S2 Effect of ozonation, H2O2 and O3/H2O2 treatment on phosphorus in the supernatant
